# Supplementary material for: Anti-Leishmania amazonensis Activity, Cytotoxic Features, and Chemical Profile of Allium sativum (Garlic) Essential Oil
Source: MDPI journal article supplement (doi:10.3390/tropicalmed8070375), 2023-07-21
Supplement: s1 [file s1]

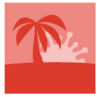

Supplementary material

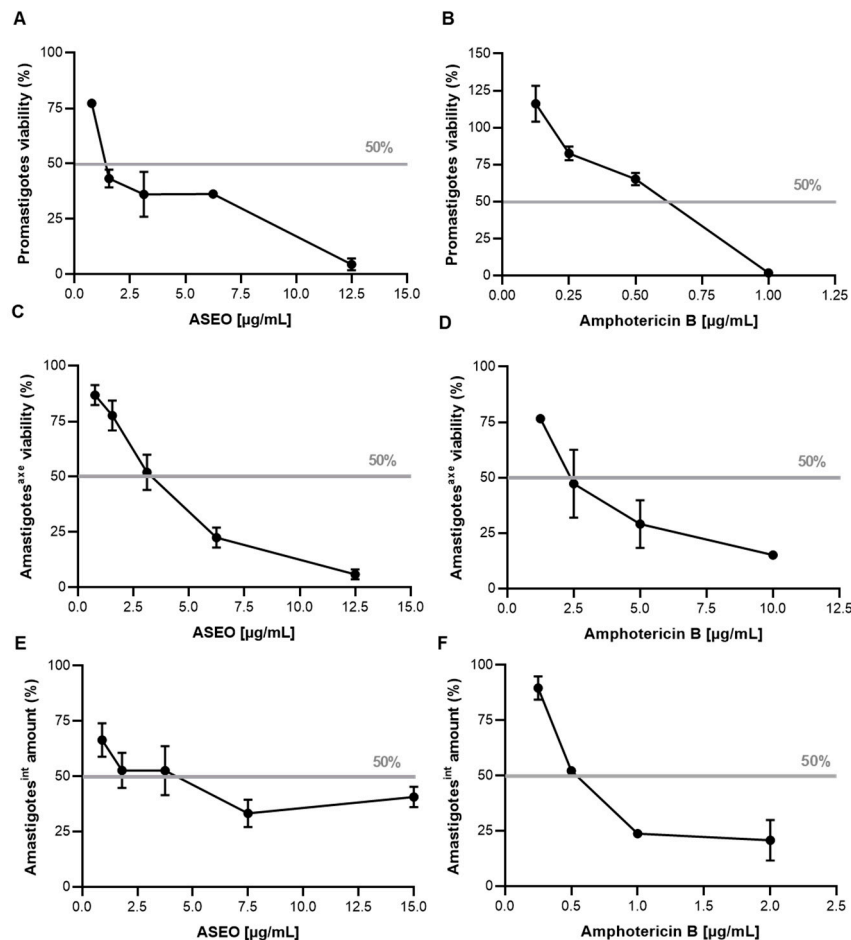

**Figure S1.** ASEO effect of ASEO on *Leishmania amazonensis* developmental forms. Parasite were treated with several concentrations of ASEO for 48 h. Amphotericin B (AmB) was used as a positive control (reference drug). (A) ASEO-treated promastigotes; (B) AmB-treated promastigotes; (C) ASEO-treated axenic amastigotes; (D) AmB-treated axenic amastigotes; (E) ASEO-treated intracellular amastigotes; (F) AmB-treated intracellular amastigotes.

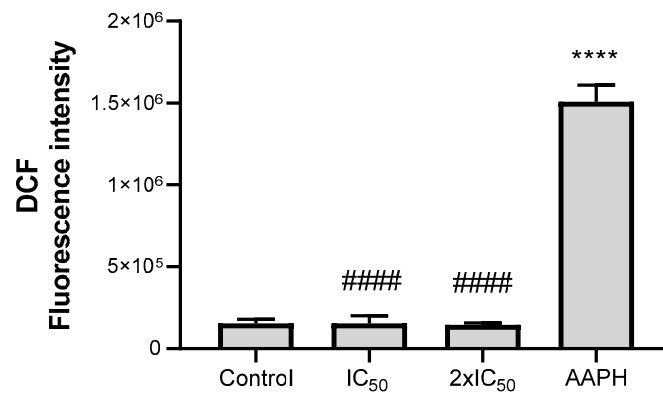

**Figure S2.** Intracellular ROS production by *L. amazonensis* axenic amastigotes treated with ASEO. Parasites were treated with ASEO at IC<sub>50</sub> and 2xIC<sub>50</sub> concentrations for 4 h. AAPH (1 mM) was used as a control for ROS production. Statistical analysis was performed using one-way ANOVA followed by Tukey's post-test, comparing each treatment with the controls. The hashtag symbols (#####) indicate that the ASEO treatments were significantly different from the AAPH control (##### $p < 0.0001$ ). The asterisks (\*\*\*\* $p < 0.0001$ ) indicate a significant difference between the untreated and AAPH-treated parasites.
